# Supplementary material for: Uridine Prevents Fenofibrate-Induced Fatty Liver
Source: PubMed Central journal article supplement (PMC3901748; doi:10.1371/journal.pone.0087179), 2014-01-24
Supplement: pone.0087179.s006.pdf [file pone.0087179.s006.pdf]

**Table S1. Liver acetylated proteins identified with MALDI-TOF-MS**

| Spot # | Protein Name                                      | Accession No. | Protein MW (Dalton) | Protein PI | Pep.Count | Protein Score | Protein Score C. I. % | Total Ion Score | Total Ion C. I. % |
|--------|---------------------------------------------------|---------------|---------------------|------------|-----------|---------------|-----------------------|-----------------|-------------------|
| 1      | Endoplasmin                                       | ENPL          | 92,418              | 4.7        | 34        | 1,120         | 100                   | 856             | 100               |
| 2      | 78 kDa glucose-regulated protein                  | GRP78         | 72,378              | 5.1        | 29        | 1,230         | 100                   | 1005            | 100               |
| 3      | Cytosolic 10-formyltetrahydrofolate dehydrogenase | AL1L1         | 98,647              | 5.6        | 39        | 1,280         | 100                   | 945             | 100               |
| 4      | S-adenosylmethionine synthase isoform type-1      | METK1         | 43,481              | 5.5        | 19        | 751           | 100                   | 603             | 100               |
| 5      | Aldehyde dehydrogenase, mitochondrial             | ALDH2         | 56,502              | 7.5        | 19        | 750           | 100                   | 623             | 100               |
| 6      | Glutamate dehydrogenase 1, mitochondrial          | DHE3          | 61,298              | 8.1        | 20        | 641           | 100                   | 497             | 100               |
| 7      | Glutamate dehydrogenase 1, mitochondrial          | DHE3          | 61,298              | 8.1        | 21        | 688           | 100                   | 535             | 100               |
| 8      | Dihydropyrimidinase                               | DPYS          | 56,689              | 6.7        | 13        | 559           | 100                   | 492             | 100               |
| 9      | Catalase                                          | CATA          | 59,758              | 7.7        | 28        | 1,110         | 100                   | 856             | 100               |
| 10     | Delta-1-pyrroline-5-carboxylate dehydrogenase     | AL4A1         | 61,802              | 8.5        | 21        | 1,060         | 100                   | 917             | 100               |
| 11     | Methylmalonate-semialdehyde dehydrogenase         | MMSA          | 57,879              | 8.3        | 21        | 911           | 100                   | 754             | 100               |
| 12     | SEC14-like protein 2                              | S14L2         | 46,271              | 6.7        | 11        | 121           | 100                   | 72              | 100               |
| 13     | Fumarylacetoacetase                               | FAAA          | 46,146              | 6.7        | 16        | 588           | 100                   | 471             | 100               |
| 14     | Isocitrate dehydrogenase [NADP] cytoplasmic       | IDHC          | 46,645              | 6.7        | 20        | 608           | 100                   | 473             | 100               |
| 15     | Argininosuccinate synthase                        | ASSY          | 46,555              | 8.4        | 16        | 492           | 100                   | 381             | 100               |
| 16     | Betaine--homocysteine S-methyltransferase 1       | BHMT1         | 44,992              | 8.0        | 17        | 454           | 100                   | 336             | 100               |
| 17     | Argininosuccinate synthase                        | ASSY          | 46,555              | 8.4        | 18        | 574           | 100                   | 442             | 100               |
| 18     | Argininosuccinate synthase                        | ASSY          | 46,555              | 8.4        | 17        | 638           | 100                   | 515             | 100               |
| 19     | Regucalcin                                        | RGN           | 33,386              | 5.2        | 18        | 1,000         | 100                   | 855             | 100               |
| 20     | Indolethylamine N-methyltransferase               | INMT          | 29,441              | 6.0        | 14        | 1,060         | 100                   | 943             | 100               |
| 21     | Glycine N-methyltransferase                       | GNMT          | 32,654              | 7.1        | 9         | 633           | 100                   | 583             | 100               |
| 22     | Carbonic anhydrase 3                              | CAH3          | 29,348              | 6.9        | 18        | 756           | 100                   | 593             | 100               |
| 23     | Carbonic anhydrase 3                              | CAH3          | 29,348              | 6.9        | 19        | 781           | 100                   | 602             | 100               |
| 24     | Superoxide dismutase [Mn], mitochondrial          | SODM          | 24,588              | 8.8        | 7         | 149           | 100                   | 108             | 100               |
| 25     | Glutathione S-transferase                         | GSTM1         | 25,953              | 7.7        | 19        | 685           | 100                   | 515             | 100               |
| 26     | Histone H2B type 1-P                              | H2B1P         | 13,984              | 10.3       | 8         | 124           | 100                   | 76              | 100               |
| 27     | Catalase                                          | CATA          | 59,758              | 7.7        | 26        | 1,090         | 100                   | 870             | 100               |
| 28     | Aldehyde dehydrogenase X, mitochondrial           | AL1B1         | 57,517              | 6.6        | 3         | 53            | 92                    | 39              | 99                |
| 29     | Alpha-enolase                                     | ENOA          | 47,111              | 6.4        | 15        | 629           | 100                   | 534             | 100               |
| 30     | Acyl-coenzyme A thioesterase 1                    | ACOT1         | 46,107              | 6.1        | 13        | 383           | 100                   | 304             | 100               |
| 31     | Arginase-1                                        | ARG1          | 34,786              | 6.5        | 18        | 643           | 100                   | 492             | 100               |
| 32     | Hydroxymethylglutaryl-CoA synthase, mitochondrial | HMCS2         | 56,787              | 8.7        | 12        | 190           | 100                   | 138             | 100               |
| 33     | Hydroxymethylglutaryl-CoA synthase, mitochondrial | HMCS2         | 56,787              | 8.7        | 19        | 799           | 100                   | 683             | 100               |
| 34     | Alcohol dehydrogenase 1                           | ADH1          | 39,746              | 8.4        | 12        | 413           | 100                   | 347             | 100               |
| 35     | 3-ketoacyl-CoA thiolase B, peroxisomal            | THIKB         | 43,968              | 8.8        | 20        | 1,100         | 100                   | 934             | 100               |
