# Supplementary material for: Uridine Prevents Fenofibrate-Induced Fatty Liver
Source: PubMed Central journal article supplement (PMC3901748; doi:10.1371/journal.pone.0087179), 2014-01-24
Supplement: pone.0087179.s007.pdf [file pone.0087179.s007.pdf]

**Table S2. Liver acetylated proteins identified with MALDI-TOF-MS (continued 1)**

| Spot # | Protein Name                                          | Accession No. | Protein MW (Dalton) | Protein PI | Pep.Count | Protein Score | Protein Score C. I. % | Total Ion Score | Total Ion C. I. % |
|--------|-------------------------------------------------------|---------------|---------------------|------------|-----------|---------------|-----------------------|-----------------|-------------------|
| 36     | Malate dehydrogenase, mitochondrial                   | MDHM          | 35,589              | 8.9        | 11        | 456           | 100                   | 390             | 100               |
| 37     | Cytochrome c1, heme protein, mitochondrial            | CY1           | 35,305              | 9.2        | 8         | 110           | 100                   | 69              | 100               |
| 38     | L-xylulose reductase                                  | DCXR          | 25,729              | 6.8        | 10        | 281           | 100                   | 215             | 100               |
| 39     | D-beta-hydroxybutyrate dehydrogenase, mitochondrial   | BDH           | 38,274              | 9.1        | 12        | 494           | 100                   | 428             | 100               |
| 40     | Heat shock cognate 71 kDa protein                     | HSP7C         | 70,827              | 5.4        | 27        | 1,090         | 100                   | 874             | 100               |
| 41     | ATP synthase subunit beta, mitochondrial              | ATPB          | 56,266              | 5.2        | 25        | 1,130         | 100                   | 900             | 100               |
| 42     | Actin, cytoplasmic 2                                  | ACTG          | 41,766              | 5.3        | 21        | 895           | 100                   | 714             | 100               |
| 43     | Fructose-bisphosphate aldolase B                      | ALDOB         | 39,482              | 8.5        | 18        | 953           | 100                   | 807             | 100               |
| 44     | Glyceraldehyde-3-phosphate dehydrogenase              | G3PT          | 47,626              | 8.1        | 4         | 141           | 100                   | 132             | 100               |
| 45     | Uricase                                               | URIC          | 35,017              | 8.5        | 16        | 665           | 100                   | 546             | 100               |
| 46     | Carbamoyl-phosphate synthase [ammonia], mitochondrial | CPSM          | 164,514             | 6.5        | 44        | 1,050         | 100                   | 722             | 100               |
| 47     | 60 kDa heat shock protein, mitochondrial              | CH60          | 60,917              | 5.9        | 27        | 1,380         | 100                   | 1151            | 100               |
| 48     | Epoxide hydrolase 2                                   | HYES          | 62,475              | 5.9        | 27        | 1,160         | 100                   | 932             | 100               |
| 49     | NADP-dependent malic enzyme                           | MAOX          | 63,913              | 7.2        | 25        | 1,080         | 100                   | 877             | 100               |
| 50     | Peroxisomal acyl-coenzyme A oxidase 1                 | ACOX1         | 74,601              | 8.6        | 28        | 1,050         | 100                   | 823             | 100               |
| 51     | Peroxisomal bifunctional enzyme                       | ECHP          | 78,252              | 9.2        | 33        | 1,090         | 100                   | 804             | 100               |
| 52     | Peroxisomal bifunctional enzyme                       | ECHP          | 78,252              | 9.2        | 33        | 1,080         | 100                   | 789             | 100               |
| 53     | 3-ketoacyl-CoA thiolase B, peroxisomal                | THIKB         | 43,968              | 8.8        | 20        | 1,090         | 100                   | 930             | 100               |
| 54     | Elongation factor 1-alpha 1                           | EF1A1         | 50,082              | 9.1        | 16        | 463           | 100                   | 358             | 100               |
| 55     | Glycine N-acyltransferase-like protein                | GLYAL         | 34,086              | 7.7        | 16        | 765           | 100                   | 643             | 100               |
| 56     | Hydroxyacyl-coenzyme A dehydrogenase, mitochondrial   | HCDH          | 34,442              | 8.8        | 16        | 731           | 100                   | 599             | 100               |
| 57     | Electron transfer flavoprotein subunit beta           | ETFB          | 27,606              | 8.2        | 10        | 610           | 100                   | 554             | 100               |
| 58     | Protein NipSnap homolog 1                             | NIPS1         | 33,342              | 9.5        | 16        | 726           | 100                   | 602             | 100               |
| 59     | Peroxisomal acyl-coenzyme A oxidase 1                 | ACOX1         | 74,601              | 8.6        | 13        | 745           | 100                   | 690             | 100               |
| 60     | Fatty acid-binding protein, liver                     | FABPL         | 14,237              | 8.6        | 8         | 462           | 100                   | 400             | 100               |
| 61     | Phosphoglucosyltransferase-1                          | PGM1          | 61,380              | 6.1        | 19        | 402           | 100                   | 283             | 100               |
| 62     | 4-trimethylaminobutyraldehyde dehydrogenase           | AL9A1         | 53,480              | 6.6        | 19        | 544           | 100                   | 424             | 100               |
| 63     | Protein disulfide-isomerase A4                        | PDIA4         | 71,938              | 5.2        | 16        | 79            | 100                   | 1               |                   |
| 64     | Peroxisomal acyl-coenzyme A oxidase 1                 | ACOX1         | 74,601              | 8.6        | 30        | 1,070         | 100                   | 816             | 100               |
| 65     | Retinal dehydrogenase 1                               | AL1A1         | 54,433              | 7.9        | 26        | 798           | 100                   | 583             | 100               |
| 66     | Hydroxymethylglutaryl-CoA synthase, mitochondrial     | HMCS2         | 56,787              | 8.7        | 20        | 755           | 100                   | 627             | 100               |
| 67     | Hydroxymethylglutaryl-CoA synthase, mitochondrial     | HMCS2         | 56,787              | 8.7        | 14        | 65            | 99                    |                 |                   |
| 68     | Alcohol dehydrogenase [NADP+]                         | AK1A1         | 36,564              | 6.9        | 19        | 727           | 100                   | 560             | 100               |
| 69     | Glycerol-3-phosphate dehydrogenase [NAD+]             | GPDA          | 37,548              | 6.8        | 22        | 986           | 100                   | 777             | 100               |
| 70     | S-formylglutathione hydrolase                         | ESTD          | 31,299              | 6.7        | 5         | 87            | 100                   | 67              | 100               |
